# Supplementary material for: Activation of the MAPK11/12/13/14 (p38 MAPK) pathway regulates the transcription of autophagy genes in response to oxidative stress induced by a novel copper complex in HeLa cells
Source: PubMed Central journal article supplement — Autophagy. 2014 May 13;10(7):1285–300. doi: 10.4161/auto.28789 (PMC4203553; doi:10.4161/auto.28789), 2014-05-13
Supplement: auto-10-1285-s01.pdf [file auto-10-1285-s01.pdf]

## **Supplemental Material to:**

**Wu Zhong, Haichuan Zhu, Fugeng Sheng, Yonglu Tian,  
Jun Zhou, Yingyu Chen, Song Li, and Jian Lin**

**Activation of the MAPK11/12/13/14 (p38 MAPK) pathway  
regulates the transcription of autophagy genes in  
response to oxidative stress induced by a novel copper  
complex in HeLa cells**

**Autophagy 2014; 10(7)**

**<http://dx.doi.org/10.4161/auto.28789>**

**[www.landesbioscience.com/journals/autophagy/article/28789](http://www.landesbioscience.com/journals/autophagy/article/28789)**

**Table S1. Overview of RNA-Seq results in HeLa cells treated with HYF127c/Cu.**  
RNA-Seq reports

a

| Up-Down-Regulation | Table.S4 (Fold>1,<br>p-value<0.05) | Table.S3 (Fold>1 or Fold<-1,<br>p-value<0.01 and<br>FDR<0.01) |
|--------------------|------------------------------------|---------------------------------------------------------------|
| Up                 | 1096                               | 105                                                           |
| Down               | 4611                               | 547                                                           |
| Total              | 5707                               | 652                                                           |

b

| Log <sub>2</sub> (HYF127c/Cu/<br>Control) | Table S4<br>( p-value<0.05) | Table.S3<br>(p-value<0.01and FDR<0.01) |
|-------------------------------------------|-----------------------------|----------------------------------------|
| Fold≥10                                   | 25                          | 2                                      |
| 5≤Fold≤10                                 | 367                         | 31                                     |
| 1≤Fold≤5                                  | 704                         | 72                                     |
| -5≤Fold≤-1                                | 4532                        | 446                                    |
| -10≤Fold≤-5                               | 79                          | 1                                      |

**Table S2. The primers used for real-time PCR.**

Primes used for Real-Time PCR

| primer<br>designation                  | primer sequence                                           |
|----------------------------------------|-----------------------------------------------------------|
| <i>HSPA1A_fw</i><br><i>HSPA1A_re</i>   | 5'-gtgctgaccaagatgaaggag-3'<br>5'-gctgcgagtcgttgaagtag-3' |
| <i>BAG3_fw</i><br><i>BAG3_re</i>       | 5'-ctccattccgggtatacaga-3'<br>5'-tggtgggtctgtactccc-3'    |
| <i>MAPLC3B_fw</i><br><i>MAPLC3B_re</i> | 5'-agcagcatccaacaaaatc-3'<br>5'-ctgtgtccgttcaccaacag-3'   |
| <i>ACTIN_fw</i><br><i>ACTIN_re</i>     | 5'-ggaacgggtgaaggtgacagc-3'<br>5'-aatcaaagtcctcggccaca-3' |
| <i>BECN1_fw</i><br><i>BECN1_re</i>     | 5'-caagatcctggaccgtgtca-3'<br>5'-tggcactttctgtgacatca-3'  |
| <i>MTOR_fw</i><br><i>MTOR_re</i>       | 5'-ggaggctgatggacacaaat-3'<br>5'-ctgtgtccccgttttcta-3'    |
| <i>SQSTM1_fw</i><br><i>SQSTM1_re</i>   | 5'-agctgcctgtaccacatc-3'<br>5'-ggggatgctttgaactgg-3'      |

|                                        |                                                                 |
|----------------------------------------|-----------------------------------------------------------------|
| <i>MCL1_fw</i><br><i>MCL1_re</i>       | 5'-cggtaatcggactcaacctc-3'<br>5'-cctccttctccgtagcca-3'          |
| <i>ATG7_fw</i><br><i>ATG7_re</i>       | 5'-gatccggggattctttcacg-3'<br>5'-cagcaatgtaagaccagtcagt-3'      |
| <i>ATG16L1_fw</i><br><i>ATG16L1_re</i> | 5'-tgccctgcagatcacttttac-3'<br>5'-gagtcgcttagtggtgctc-3'        |
| <i>BCL2L1_fw</i><br><i>BCL2L1_re</i>   | 5'-atcaatggcaacctcctg-3'<br>5'-ttgtctacgctttccacgca-3'          |
| <i>BCL2_fw</i><br><i>BCL2_re</i>       | 5'-tgtggatgactgagtacctaacc-3'<br>5'-cagccaggagaaatcaaacagagg-3' |
| <i>ATG5_fw</i><br><i>ATG5_re</i>       | 5'-tggatttcgttatatccccttag-3'<br>5'-cctagtgtgtgcaactgtcca-3'    |

Figure S1

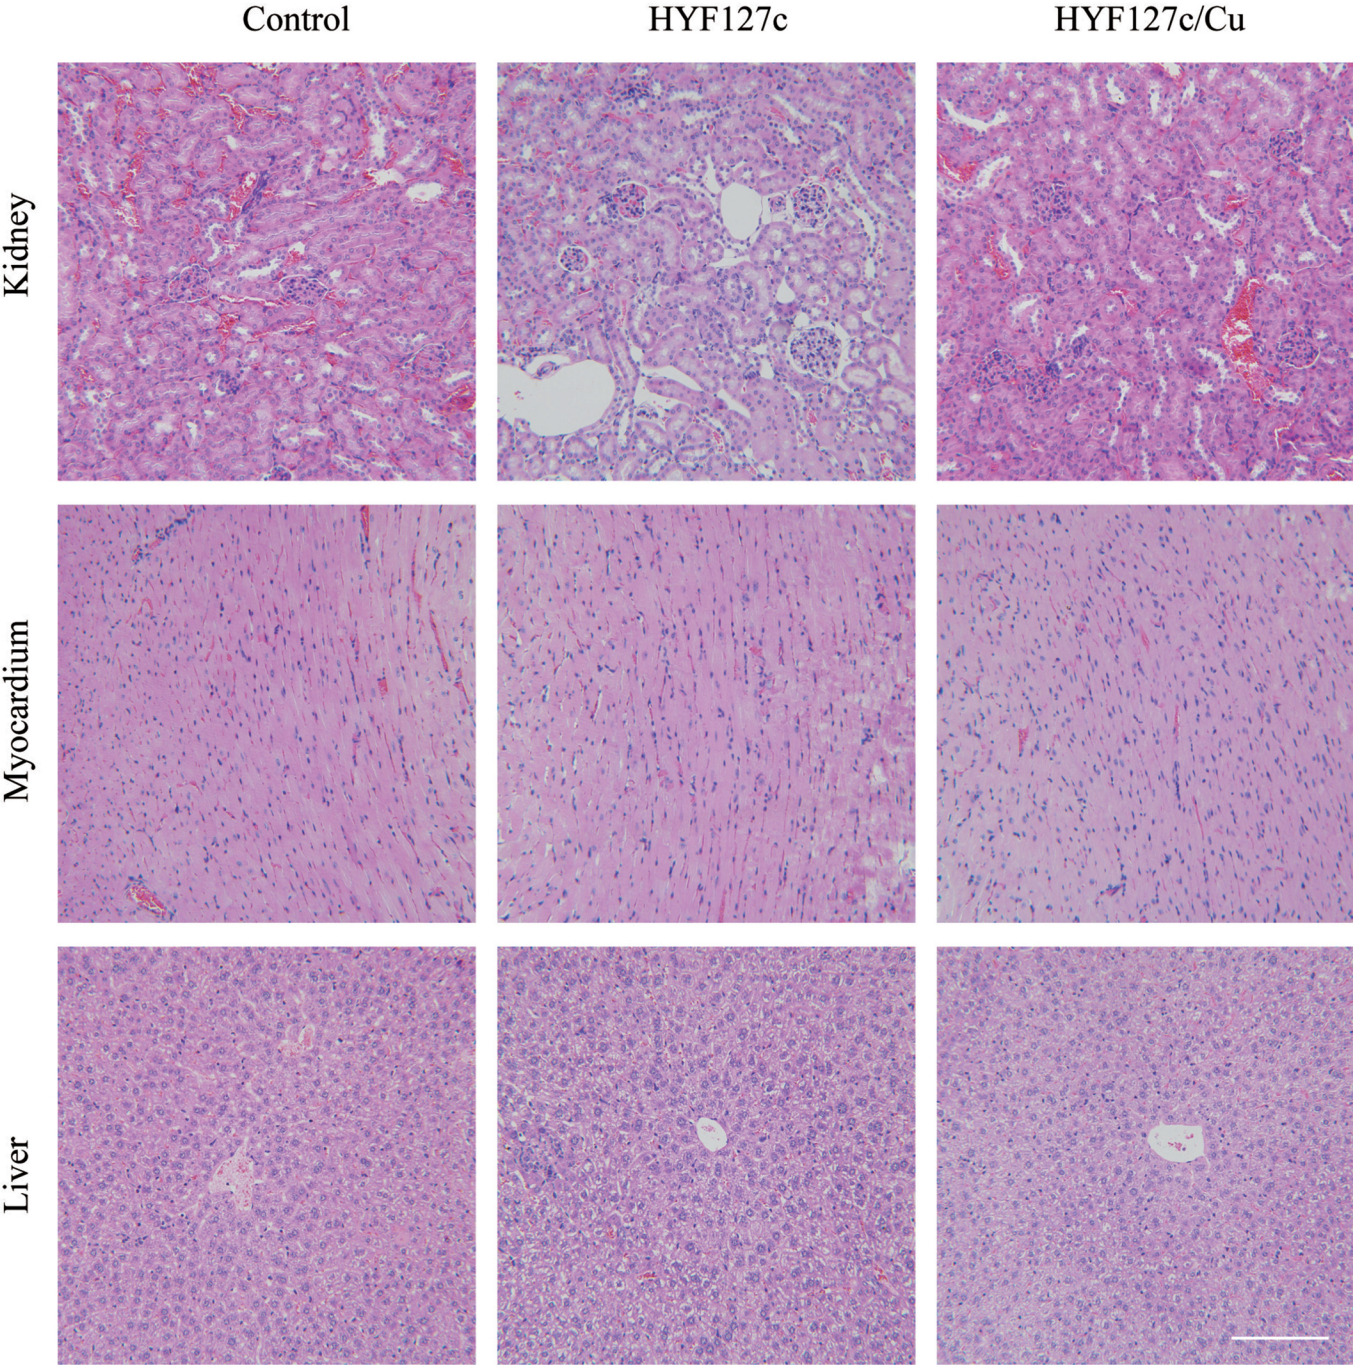



Figure S2

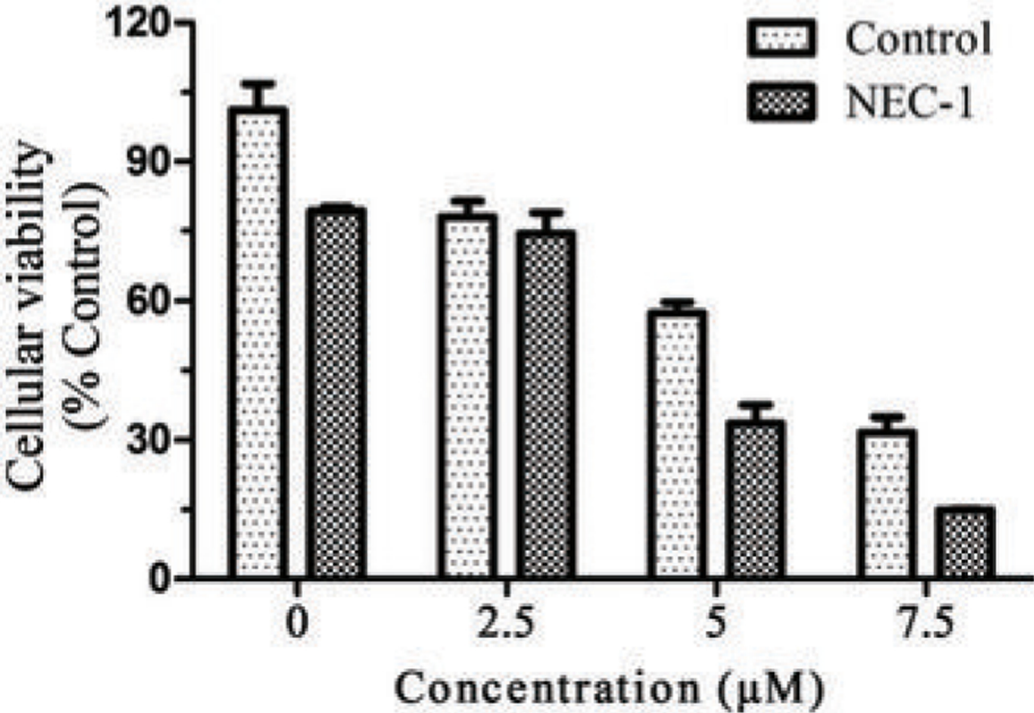

Figure S3

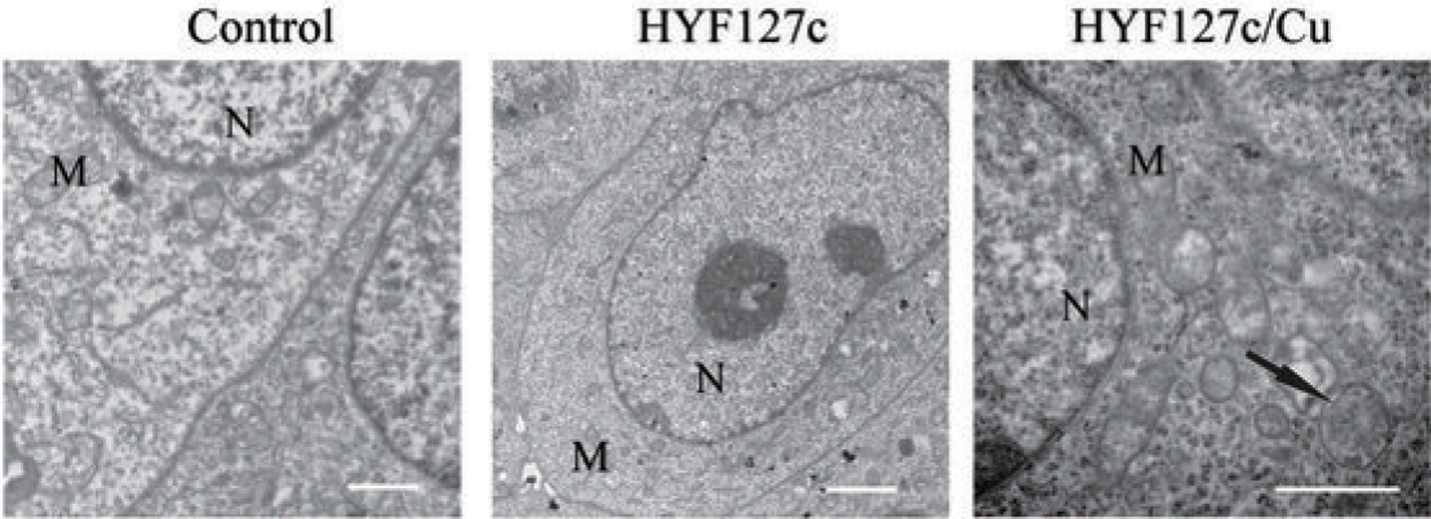

Figure S4

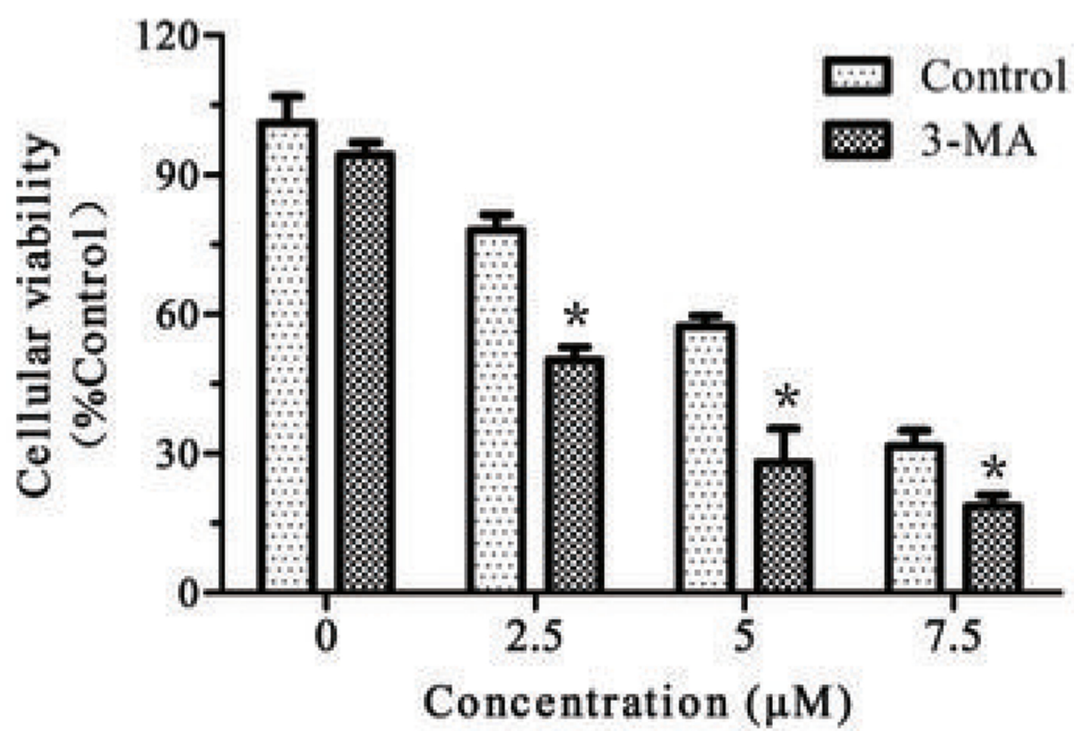

Figure S5

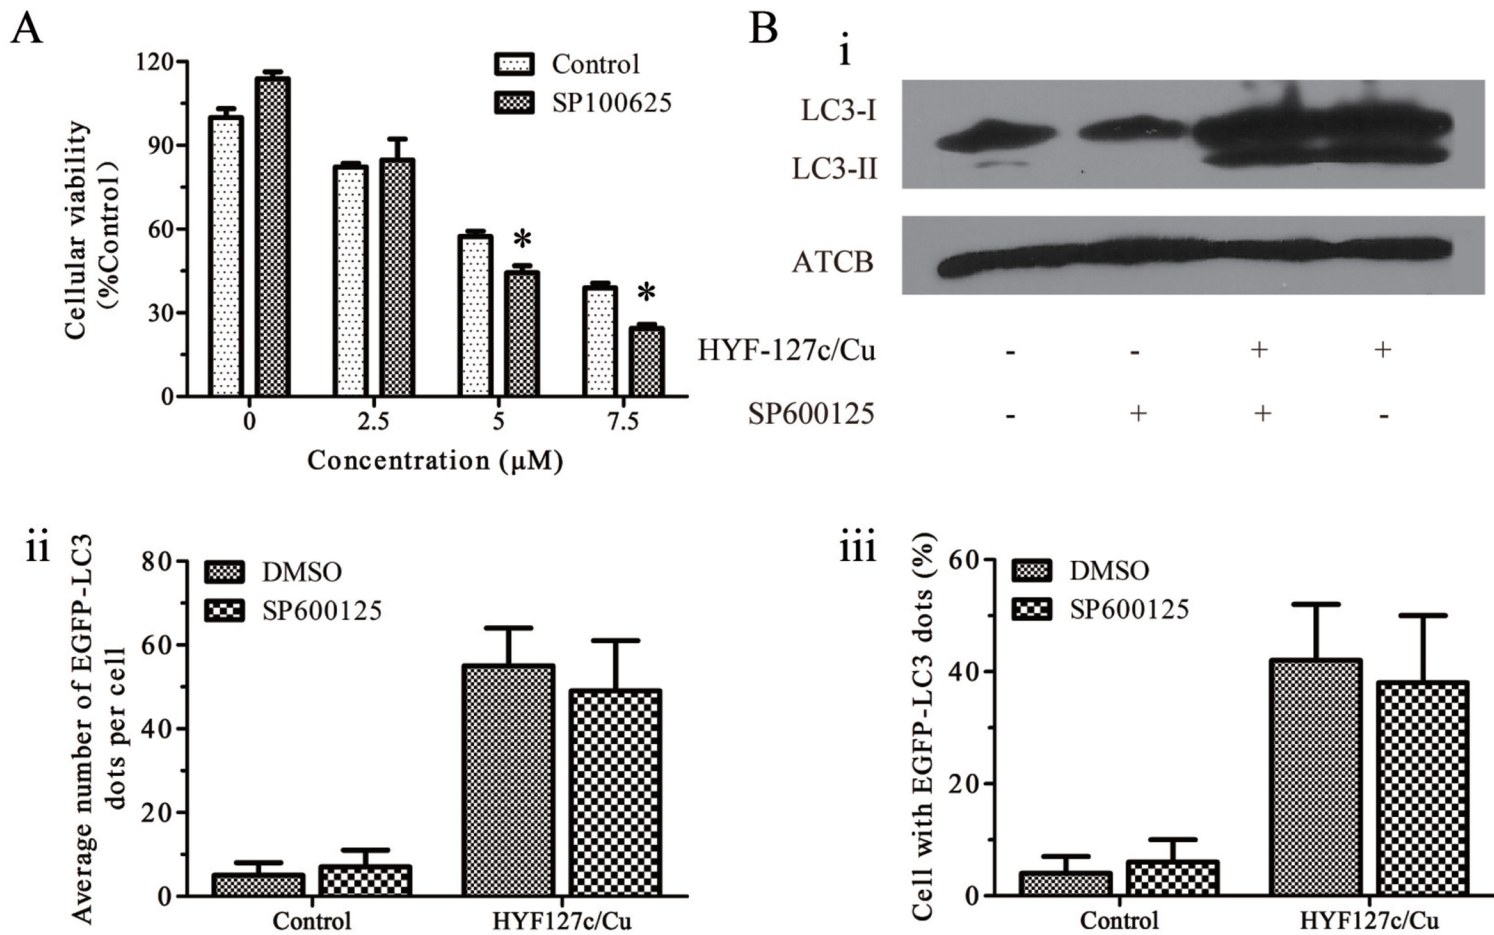



**Figure S1.** The histological results from kidney, myocardium, and liver in nude mice treated with HYF127c/Cu or HYF127c.

**Figure S2.** The effect of the combination of necrostatin-1 and HYF127c/Cu on cellular viability in HeLa cells, (n=3).

**Figure S3.** Electron microscopy images showing extensive cytoplasm vacuolization enclosed in a double membrane in HYF127c/Cu-treated tumors. Electron microscopy image of an untreated tumor is also shown for comparison. The double membrane of the autophagic vacuoles is indicated by a black arrow. N, nucleus; M, mitochondrion. Bar: 0.5  $\mu$ m.

**Figure S4.** The effect of the combination of 3-MA and HYF127c/Cu on cellular viability of HeLa cells (n=3, \*:  $P < 0.05$ ).

**Figure S5.** The effect of SP600125 on HYF127c/Cu-treated cells. **(A)** The effect of SP600125 on the viability of HYF127c/Cu-treated cells (n=3, \*:  $P < 0.05$ ). **(B)** The effect of SP600125 on autophagy in HYF127c/Cu-treated cells. (i) Western blotting showed that SP600125 had no effect on LC3-I conversion. SP600125 had no effect on the percentage of cells with EGFP-LC3 dots (ii) and the average number of EGFP-LC3 dots in cells (iii) (n=3, \*:  $P < 0.05$ ).
